# Supplementary material
Source: ML conference proceedings conference paper supplement (https://openreview.net/forum?id=x1FgW3vSM6)
Supplement: supplementary_material [file attachment]

---

# Supplementary Material for NeurIPS 2023 Submission

#9335

## Flag Aggregator: Distributed Training under Failures and Augmented Losses using Convex Optimization

---

Anonymous Author(s)

Affiliation

Address

email

### Abstract

1 Modern ML applications increasingly rely on complex deep learning models and  
2 large datasets. There has been an exponential growth in the amount of computa-  
3 tion needed to train the largest models. Therefore, to scale computation and data,  
4 these models are inevitably trained in a distributed manner in clusters of nodes,  
5 and their updates are aggregated before being applied to the model. However, a  
6 distributed setup is prone to Byzantine failures of individual nodes, components,  
7 and software. With data augmentation added to these settings, there is a critical  
8 need for robust and efficient aggregation systems. We define the quality of workers  
9 as reconstruction ratios  $\in (0, 1]$ , and formulate aggregation as a Maximum Like-  
10 lihood Estimation procedure using Beta densities. We show that the Regularized  
11 form of log-likelihood wrt subspace can be approximately solved using iterative  
12 least squares solver, and provide convergence guarantees using recent Convex  
13 Optimization landscape results. Our empirical findings demonstrate that our ap-  
14 proach significantly enhances the robustness of state-of-the-art Byzantine resilient  
15 aggregators. We evaluate our method in a distributed setup with a parameter server,  
16 and show simultaneous improvements in communication efficiency and accuracy  
17 across various tasks.

### 18 A Background and Related Work

19 Researchers have approached the Byzantine resilience problem from two main directions. In the  
20 first class of works, techniques such as geometric median and majority voting try to perform robust  
21 aggregation [1], [2], [3]. The other class of works uses redundancy and assigns each worker redundant  
22 gradient computation tasks [4], [5].

23 From another aspect, robustness can be provided on two levels. In weak Byzantine resilience methods  
24 such as Coordinate-wise median [6] and Krum [3], the learning is guaranteed to converge. In strong  
25 Byzantine resilience, the learning converges to a state as the system would converge in case no  
26 Byzantine worker existed. Draco [5] and Bulyan [7] are examples of this class. Convergence analysis  
27 of iterated reweighing type algorithms has been done for specific problem classes. For example,  
28 [8, 9] show that when IRLS is applied for sparse regression tasks, the iterates can converge linearly.  
29 Convergence analysis of matrix factorization problems using IRLS-type schemes has been proposed  
30 before, see [10, 11].

31 It is well known that data augmentation techniques help in improving the generalization capabilities of  
32 models by adding more identically distributed samples to the data pool. [12, 13, 14]. The techniques

have evolved along with the development of the models, progressing from the basic ones like rotation, translation, cropping, flipping, injecting Gaussian noise [15] etc., to now the sophisticated ones (random erasing/masking [16], cutout [17] etc.). Multi-modal learning setups [18, 19, 20], use different ways to combine data of different modalities (text, images, audio etc.) to train deep learning networks.

## B Tractability of Computing Flag Aggregators

In this section, we characterize the computational complexity of solving the Flag Aggregation problem via IRLS type schemes using results from convex optimization. First, we present a tight convex relaxation of the Flag Median problem by considering it as an instantiation of rank constrained optimization problem. We then show that we can represent our convex relaxation as a Second Order Cone Program which can be solved using off-the-shelf solvers [21]. Second, we argue that approximately solving such rank constrained problems in the factored space is an effective strategy using new results from [22] which builds on asymptotic convergence in [10]. Our results highlight that the Flag Median problem can be approximately solved using smooth optimization techniques, thus explaining the practical success of an IRLS type iterative solver.

**Interpreting Flag Aggregator (equation 5 in the main paper) in the Case  $m = 1$ .** We first present a convex reformulation of the Flag Aggregator problem (5) in the case when the number of subspaces (or columns) is equal to 1. To make the exposition easier, we will also assume that  $\lambda = 0$ . With these assumptions, and using the fact that  $\|y\|_2 = 1$ , each term in the objective function of our FA aggregator in (5) can be rewritten as,

$$\sqrt{(1 - (y^T \tilde{g}_i))^2} = \sqrt{y^T (I - \tilde{g}_i \tilde{g}_i^T) y} = \|\tilde{B}_i y\|_2, \quad (1)$$

where we use the notation  $\tilde{g}_i = g_i / \|g_i\|$  to denote the normalized worker gradients,  $I \in \mathbb{R}^{n \times n}$  is the  $n \times n$  identity matrix, and  $\tilde{B}_i$  is the square root of the matrix  $I - \tilde{g}_i \tilde{g}_i^T$ . Observe that we can rewrite all the terms in equation (5) in the main paper in a similar fashion as in (1). Furthermore, by relaxing the feasible set to the  $n$ -Ball given by  $\{y \in \mathbb{R}^n : \|y\|_2 \leq 1\}$ , we obtain a Second Order Cone Programming (SOCP) relaxation of our FA problem in (5). SOCP problems can be solved using off-the-shelf packages with open source optimization solvers for gradient aggregation purposes in small scale settings, that is, when the number of parameters  $n \approx 10^4$  [23, 24, 25]. Our convex reformulation immediately yields insights on why reweighing type algorithm that was proposed in [26] works well in practice – for example see Section 3 in [27] in which various smoothing functions similar to the Flag Median (square) based smoothing are listed as options. More generally, our SOCP relaxation shows that if the smoothed version can be solved in closed form (or efficiently), then a reweighing based algorithm can be safely considered a viable candidate for aggregation purposes.

**Tractable Reformulations when  $m > 1$  for Aggregation Purposes.** Note that for any feasible  $Y$  such that  $Y^T Y = I$ , we have that the  $\text{tr}(Y) = m$ .

*Remark B.1 (Parametrizing Subspaces using  $Y$ ).* This assumption is without loss of generality. To see this, first note that in general, a (nondegenerate) subspace  $\mathcal{S}$  of a vector space  $\mathcal{V}$  is defined as a subset of  $\mathcal{V}$  that is closed under linear combinations. Fortunately, in finite dimensions, we can represent  $\mathcal{S}$  as a rectangular matrix  $M$  by Fundamental theorem of linear algebra. So, we simply use  $Y$  to represent the basis of this matrix  $M$  that represents the subspace  $\mathcal{S}$  in our FA formulation.

Using this, we can rewrite each term in the objective function of our FA aggregator in equation (5) in the main paper as,

$$\sqrt{\text{tr} \left( Y^T \left( \frac{I}{m} - \frac{g_i g_i^T}{\|g_i\|_2^2} \right) Y \right)} = \sqrt{\text{tr} (Y^T M_i Y)}, \quad (2)$$

where  $M_i = M_i^T, i = 1, \dots, p$  is symmetric matrix with at most one negative eigenvalue. Optimization problems involving quadratic functions with negative eigenvalues can be solved globally, in some cases [28, 29]. We consider methods that can efficiently (say in polynomial running time in  $n$ ) provide solutions that are locally optimal. In order to do so, we consider the Semi Definite programming relaxation obtained by introducing matrix  $Z \succeq 0 \in \mathbb{R}^{nm \times nm}$  to represent the term  $Y Y^T$ , constrained to be rank one, and such that  $\text{tr}(Z) = m$ .

By using  $\text{vec}(Y) \in \mathbb{R}^{nm}$  to denote the vector obtained by stacking columns of  $Z$ , when  $m > 1$ , we obtain a trace norm constrained SOCP. Importantly, objective function can be written as a sum of terms of the form,

$$\sqrt{\text{vec}(Y)^T (I \otimes M_i) \text{vec}(Y)} = \sqrt{\text{tr}(Z^T (I \otimes M_i))}, \quad (3)$$

where  $\otimes$  denotes the usual tensor (or Kronecker) product between matrices.

**Properties of lifted formulation in (3).** There are some advantages to the loss function as specified in our reformulation (3). First, note that then our relaxation coincides with the usual trace norm based Goemans-Williamson relaxation used for solving Max-Cut problem with approximation guarantees [30]. Albeit, our objective function is not linear, and to our knowledge, it is not trivial to extend the results to nonlinear cases such as ours in (3). Moreover, even when  $M_i \succeq 0$ , the  $\sqrt{\cdot}$  makes the relaxation *nonconvex*, so it is not possible to use off-the-shelf disciplined convex programming software packages such as CVXPY [31, 32]. Our key observation is that away from 0,  $\sqrt{\cdot}$  is a *differentiable* function. Hence, the objective function in (3) is differentiable with respect to  $Z$ .

*Remark B.2 (Using SDP relaxation for Aggregation.).* In essence, if the optimal solution  $Z^*$  to the SDP relaxation is a rank one matrix, then by rank factorization theorem,  $Z^*$  can be written as  $Z^* = \text{vec}(Y^*)\text{vec}(Y^*)^T$  where  $\text{vec}(Y^*) \in \mathbb{R}^{mn \times 1}$ . So, after reshaping, we can obtain our optimal subspace estimate  $Y^* \in \mathbb{R}^{m \times n}$  for aggregation purposes. In the case the optimal  $Z^*$  is not low rank, we simply use the largest rank one component of  $Z^*$ , and reshape it to get  $Y^*$ .

## C Solving Flag Aggregation Efficiently

**Convergence Analysis when  $m = 1$ .** Note that for the case  $m = 1$ , that is, FA provides unit vector  $y \in \mathbb{R}^n$  to get aggregated gradient as  $yy^T G$ , we can use smoothness based convergence results in nonconvex optimization, for example, please see [33]. We believe this addresses most of the standard training pipelines used in practice. Now, we focus on the case with  $m > 1$ .

Now that we have a smooth reformulation of the aggregation problem that we would like to solve, it is tempting to solve it using first order methods. However, naively applying first order methods can lead to slow convergence, especially since the number of decision variables is now increased to  $m^2 n^2$ . Standard projection oracles for trace norm require us to compute the full Singular Value Decomposition (SVD) of  $Z$  which becomes computationally expensive even for small values of  $m, n \approx 10$ .

Fortunately, recent results show that the factored form smooth SDPs can be solved in polynomial time using gradient based methods. That is, by setting  $Z = \text{vec}(Y)\text{vec}(Y)^T$ , and minimizing the loss functions  $L_i(Y) = \sqrt{\text{vec}(Y)^T (I \otimes M_i) \text{vec}(Y)}$  with respect to  $Y$ , we have that the set of locally optimal points coincide, see [22]. Moreover, we have the following convergence result for first order methods like Gradient Descent that require SVD of  $n \times p$  matrices:

**Lemma C.1.** *If  $L_i$  are  $\kappa_i$ -smooth, with a  $\eta_i$ -lipschitz Hessian, then projected gradient descent with constant step size converges to a locally optimal solution to (3) in  $\tilde{O}(\kappa/\epsilon^2)$  iterations where  $0 \leq \epsilon \leq \kappa^2/\eta$  is a error tolerance parameter,  $\kappa = \max_i \kappa_i$ , and  $\eta = \max_i \eta_i$ .*

Above lemma C.1 says that gradient descent will output an aggregation  $Y$  that satisfies second order sufficiency conditions with respect to smooth reformulated loss function in (3). All the terms inside  $\tilde{O}$  in lemma C.1 are logarithmic in dimensions  $m, n$ , lipschitz constant  $L$ , and accuracy parameter  $\epsilon$ .

*Remark C.2 (Numerical Considerations.).* Note that the lipschitz constant  $\kappa$  of the overall objective function depends on  $M_i$ . That is, when  $M_i$  has negative eigenvalues, then  $\kappa$  can be high due to the square root function. We can consider three related ways to avoid this issue. First, we can choose a value  $m' > m$  in our trace constraint such that  $M_i \succeq 0$ . Similarly, we can expand (3) (in  $\sqrt{\cdot}$ ) as outer product of columns of  $Y$  suggesting that  $\tilde{g}\tilde{g}^T$  term need to be normalized by  $m$ , thus making  $M_i \succeq 0$ . Secondly, we can consider adding a quadratic term such as  $\|Y\|_{\text{Fro}}^2$  to make the function quadratic. This has the effect of decreasing  $\kappa$  and  $\eta$  of the objective function for optimization. Finally, we can use  $m_i = \max(k_i, m)$  instead of  $\min$  in defining the loss function as in [26] which would also make  $M_i \succeq 0$ .

## 128 D Proof of Lemma C.1 when $m > 1$ .

129 We provide the missing details in Section C when  $m > 1$ . To that end, we will assume that each  
 130 worker  $i$  provides the server with a list of  $k_i$  gradients, that is,  $g_i \in \mathbb{R}^{n \times k}$  – a strict generalization  
 131 of the case considered in the main paper (with  $k = 1$ ), that may be useful independently. Note that  
 132 in [26], these  $g_i$ 's are assumed to be subspaces whereas we do not make that assumption in our FA  
 133 algorithm.

134 Now, we will show that the RHS in equation (2) and LHS in equation (3) are equivalent. For that, we  
 135 need to recall an elementary linear algebra fact relating tensor/Kronecker product, and tr operator.  
 136 Recall the definition of Kronecker product:

137 **Definition D.1.** Let  $A \in \mathbb{R}^{d_1 \times d_2}$ ,  $B \in \mathbb{R}^{e_1 \times e_2}$ , then  $A \otimes B \in \mathbb{R}^{d_1 e_1 \times d_2 e_2}$  is given by,

$$A \otimes B := \begin{bmatrix} a_{1,1}B & \dots & a_{1,d_2}B \\ \vdots & \ddots & \vdots \\ a_{d_1,1}B & \dots & a_{d_1,d_2}B \end{bmatrix}, \quad (4)$$

138 where  $a_{i,j}$  denotes the entry at the  $i$ -th row,  $j$ -th column of  $A$ .

139 **Lemma D.2** (Equivalence of Objective Functions.). *Let  $Y \in \mathbb{R}^{n \times m}$ ,  $g \in \mathbb{R}^{n \times k}$  (so,  $M \in \mathbb{R}^{n \times n}$ ).  
 140 Then, we have that,*

$$\text{tr}(Y^T g g^T Y) := \text{tr}(Y^T M Y) = \mathbf{vec}(Y)^T (I \otimes M) \mathbf{vec}(Y), \quad (5)$$

141 where  $I \in \mathbb{R}^{m \times m}$  is the identity matrix.

142 *Proof.* Using the definition of tensor product in equation (4), we can simplify the right hand side of  
 143 equation (5) as,

$$\begin{aligned} \mathbf{vec}(Y)^T (I \otimes M) \mathbf{vec}(Y) &= [y_{11}, \dots, y_{n1}, \dots, y_{1m}, \dots, y_{nm}] \begin{bmatrix} M & 0 & \dots & 0 \\ \vdots & M & \dots & \vdots \\ \vdots & \vdots & \ddots & \vdots \\ 0 & \dots & \dots & M \end{bmatrix} \begin{bmatrix} y_{11} \\ \vdots \\ y_{n1} \\ \vdots \\ y_{1m} \\ \vdots \\ y_{nm} \end{bmatrix} \\ &= \sum_{j=1}^m y_j^T M y_j \\ &= \sum_{j=1}^m \text{tr}(y_j y_j^T M) = \text{tr} \left( \sum_{j=1}^m y_j y_j^T M \right) = \text{tr} \left( \left( \sum_{j=1}^m y_j y_j^T \right) M \right) \quad (6) \\ &= \text{tr}(Y Y^T M) = \text{tr}(Y^T M Y), \quad (7) \end{aligned}$$

144 where we used the cyclic property of trace operator  $\text{tr}(\cdot)$  in equations (6), and (7) that is,  $\text{tr}(ABC) =$   
 145  $\text{tr}(CAB) = \text{tr}(BCA)$  for any dimension compatible matrices  $A, B, C$ .  $\square$

### 146 D.1 Proof of Lemma C.1

147 Recall that, given  $\tilde{M}_i = I \otimes M_i$ , the lifted cone programming relaxation of FA can be written as,

$$\min_Z \sum_i \sqrt{\text{tr}(Z^T \tilde{M}_i)} \quad \text{s.t.} \quad Z \succeq 0, \quad \text{tr}(Z) = m, \quad Z = Z^T, \quad (8)$$

148 where  $m$  is the rank of  $Z$  or number of columns of  $Y$ . We now use the above Lemma D.2 to show  
 149 that the objective function with respect to  $Z$  in the lifted formulation is smooth which gives us the  
 150 desired convergence result in Lemma C.1.

151 *Proof.* let  $\tilde{\kappa}_i > 0$ ,

$$\frac{\partial \sqrt{\text{tr}(Z^T \tilde{M}_i) + \tilde{\kappa}_i}}{\partial Z} = \frac{1}{2\sqrt{\tilde{\kappa}_i + \text{tr}(Z^T \tilde{M}_i)}} \tilde{M}_i, \quad (9)$$

152 where  $\tilde{M}_i = I \otimes M_i$  as in equation (3). Now, since  $\tilde{M}_i$  is constant with respect to  $Z$ , the gradient term  
 153 is affected only through a scalar  $\sqrt{\text{tr}(Z^T \tilde{M}_i) + \tilde{\kappa}_i}$ . So the largest magnitude or entrywise  $\ell_\infty$ -norm  
 154 of the Hessian is given by,

$$\left| \frac{\partial \frac{1}{\sqrt{\text{tr}(Z^T \tilde{M}_i) + \tilde{\kappa}_i}} \|\tilde{M}_i\|_\infty}{\partial Z} \right| = \frac{\|\tilde{M}_i\|_\infty}{2\sqrt{(\text{tr}(Z^T \tilde{M}_i) + \tilde{\kappa}_i)^3}}. \quad (10)$$

155 Now, we will argue that the gradient and hessian are lipschitz continuous in the lifted space. Since  
 156 any feasible  $Z \succeq 0$  is positive semidefinite, if  $\tilde{M}_i \succeq 0$ , then the scalar  $\text{tr}(Z^T \tilde{M}_i)$  is at least  $m \cdot \lambda_{mn}^{\tilde{M}_i}$   
 157 where  $\lambda_{mn}^{\tilde{M}_i}$  is the smallest (or  $mn$ -th) eigenvalue of  $\tilde{M}_i$ . So, we can choose  $\tilde{\kappa}_i = 0 \forall i$ . If not, then  
 158 there is a negative eigenvalue, possibly repeated. So, the gradient might not exist. In cases where  $\tilde{M}_i$   
 159 has negative eigenvalues, we can choose  $\tilde{\kappa}_i = \tilde{\kappa} = \left| \min_i \min(\lambda_{mn}^{\tilde{M}_i}, 0) \right|$ . With these choices, we  
 160 have that the gradient of the objective function in (3) is lipschitz continuous. By a similar analysis  
 161 using the third derivative, we can show that Hessian is also lipschitz continuous with respect to  $Z$ .  
 162 In other words, all the lipschitz constant of both the gradient and hessian of our overall objective  
 163 function is controlled by  $\tilde{\kappa} > 0$ . Hence, we have all conditions satisfied required for Lemma 1 in  
 164 [22], and we have our convergence result for FA in the factored space of  $\text{vec}(Y)$ .  $\square$

165 Few remarks are in order with respect to our convergence result. First, **is the choice  $\tilde{\kappa}$  important**  
 166 **for convergence?** Our convergence result shows that a perturbed objective function  $\text{tr}(Z^T \tilde{M}_i) + \tilde{\kappa}$   
 167 has the same second order stationary points as that of the objective function in the factored form  
 168 formulated using  $Y$  (or  $\text{vec}(Y)$ ). We can avoid this perturbation argument if we explicitly add  
 169 constraints  $\text{tr}(Z^T \tilde{M}_i) \geq 0$ , since projections on linear constraints can be performed efficiently  
 170 exactly (sometimes) or approximately. Note that these constraints are natural since it is not possible  
 171 to evaluate the square root of a negative number. Alternatively, we can use a smooth approximate  
 172 approximation of the absolute values  $\sqrt{|\text{tr}(Z^T \tilde{M}_i)|}$ . In this case, it is easy to see from (9), and  
 173 (10) that the constants governing the lipschitz continuity as dependent on the absolute values of the  
 174 minimum eigenvalues, as expected. In essence, no, the choice of  $\tilde{\kappa}$  does not affect the nature of  
 175 landscape – approximate locally optimal points remain approximately locally optimal. In practice,  
 176 we expect the choice of  $\tilde{\kappa}$  to affect the performance of first order methods.

177 Second, **can we assume  $\tilde{M}_i \succ 0$  for gradient aggregation purposes?** Yes, this is because, when  
 178 using first order methods to obtain locally optimal solution, the scale or norm of the gradient becomes  
 179 a secondary factor in terms of convergence. So, we can safely normalize each  $M_i$  by the nuclear  
 180 norm  $\|M_i\|_* := \sum_{j=1}^{k_i} \sigma_j$  where  $\sigma_j$  is the  $j$ -th singular value of  $M_i$ . This ensures that  $I - M_i \succeq 0$ ,  
 181 assistant convergence. While  $\|M_i\|_*$  itself might be computationally expensive to compute, we may  
 182 be able to use estimates of  $\|M_i\|_*$  via simple procedures as in [34]. In most practical implementations  
 183 including ours, we simply compute the average of the gradients computed by each worker before  
 184 sending it to the parameter server, that is,  $k_i \equiv k = 1$  in which case simply normalizing by the  
 185 euclidean norm is sufficient for our convergence result to hold. Our FA based distributed training  
 186 Algorithm 1 solves the factored form for gradient aggregation purposes (in Step 6) at the parameter  
 187 server.

188 Finally, please note that our technical assumptions are standard in optimization literature, that exploits  
 189 smoothness of the objective function – since the feasible set of  $Y$  in (1) is bounded, assumptions  
 190 are satisfied. Our proof techniques are standard, and we simply use them on our reformulation to  
 191 obtain convergence guarantee **second order stationary points** for IRLS iterations since there exists a  
 192 tractable SDP relaxation.

## 193 D.2 FA Optimality Conditions and Similarities with Bulyan [7] Baseline.

194 We first restate our Flag Aggregator with  $g_i \in \mathbb{R}^{n \times k}$  in optimization terms as follows,

$$\min_{Y: Y^T Y = I} A(Y) := \sum_{i=1}^p \sqrt{\left(1 - \frac{\text{tr}(Y^T g_i g_i^T Y)}{\text{tr}(g_i^T g_i)}\right)} + \lambda \mathcal{R}(Y), \quad (11)$$

195 and write its associated Lagrangian  $\mathcal{L}$  defined by,

$$\mathcal{L}(Y, \Gamma) := \sum_{i=1}^p \sqrt{\left(1 - \frac{\text{tr}(Y^T g_i g_i^T Y)}{\text{tr}(g_i^T g_i)}\right)} + \lambda \mathcal{R}(Y) + \text{tr}(\Gamma^T (Y^T Y - I)), \quad (12)$$

196 where  $\Gamma \in \mathbb{R}^{m \times m}$  denotes the Lagrange multipliers associated with the orthogonality constraints in  
 197 equation (11). In particular, since the constraints we have are equality, there are no sign restrictions  
 198 on  $\Gamma$ , so they are often referred to as “free”. Moreover, since  $Y$  is a real matrix, the constraints are  
 199 symmetric (i.e.,  $y_i^T y_j = y_j^T y_i$ ), we may assume that  $\Gamma = \Gamma^T$ , without loss of generality.

200 We will introduce some notations to make calculations easier. We will use  $\tilde{g}_i \in \mathbb{R}^{n \times k}$  to denote the  
 201 normalized gradients matrix of the data terms in equation (11). That is, we define

$$\tilde{g}_i := -\frac{1}{\text{tr}(g_i^T g_i) \cdot \sqrt{\left(1 - \frac{\text{tr}(Y^T g_i g_i^T Y)}{\text{tr}(g_i^T g_i)}\right)}} g_i g_i^T =: d_i g_i g_i^T. \quad (13)$$

202 With this notation, we are ready to use the first optimality conditions associated with the constrained  
 203 optimization problem in (11) with its Lagrangian in (12). By first order optimality or KKT conditions,  
 204 we have that,

$$\begin{aligned} 0 = \nabla_Y \mathcal{L}(Y_*, \Gamma_*) &= \left( \sum_{i=1}^p \tilde{g}_i \tilde{g}_i^T \right) Y_* + \lambda \nabla \mathcal{R}(Y_*) + 2Y_* \Gamma_* \\ &= G D_* G^T Y_* + \lambda \nabla \mathcal{R}(Y_*) + 2Y_* \Gamma_*, \quad (\text{Objective}) \\ 0 = \nabla_\Gamma \mathcal{L}(Y_*, \Gamma_*) &= Y_*^T Y_* - I, \quad (\text{Feasibility}) \end{aligned} \quad (14)$$

205 where  $Y_* \in \mathbb{R}^{n \times m}$ ,  $\Gamma_* \in \mathbb{R}^{m \times m}$  are the optimal primal parameters, lagrangian multipliers, and  
 206  $D_* \in \mathbb{R}_{<0}^{p \times p}$  is the diagonal matrix with entries equal to  $-d_i < 0$  as in equation (13). We may ignore  
 207 the Feasibility conditions since our algorithm returns an orthogonal matrix by design, and focus on  
 208 the Objective conditions. Now, by bringing the term associated with Lagrangian to the other side,  
 209 and then right multiplying by  $\Gamma_*^{-1}$  inverse of  $\Gamma_*$ , we have that  $Y_*$  satisfies the following identity,

$$Y_* = -\frac{1}{2} (G D_* G^T Y_* + \lambda \nabla \mathcal{R}(Y_*)) \Gamma_*^{-1}. \quad (15)$$

210 By using the identity (15), we can write an equivalent representation of our aggregation rule  $Y_* Y_*^T G$   
 211 given by,

$$\begin{aligned} Y_* Y_*^T G &= \frac{1}{4} (G D_* G^T Y_* + \lambda \nabla \mathcal{R}(Y_*)) \underbrace{\Gamma_*^{-1} \Gamma_*^{-1} (Y_*^T G D_* G^T + \lambda \nabla \mathcal{R}(Y_*))^T}_{:= \mathfrak{M}_* \in \mathbb{R}^{m \times p}} G \\ &\propto (G D_* G^T Y_* + \lambda \nabla \mathcal{R}(Y_*)) \mathfrak{M}_* \\ &= G \underbrace{D_* G^T Y_*}_{:= S'_* \in \mathbb{R}^{p \times m}} \mathfrak{M}_* + \lambda \nabla \mathcal{R}(Y_*) \mathfrak{M}_* \\ &= G S'_* \mathfrak{M}_* + \lambda \nabla \mathcal{R}(Y_*) \mathfrak{M}_* \\ &:= G S_{\text{FA}} + \lambda \nabla \mathcal{R}(Y_*) \mathfrak{M}_*, \end{aligned} \quad (16)$$

212 that is, the update rule of FA can be seen as a left multiplication with the square “flag selection”  
 213 matrix  $S_{\text{SA}} = S'_* \mathfrak{M}_* \in \mathbb{R}^{p \times p}$ , and then perturbing with the gradient  $\nabla \mathcal{R}(Y_*)$  of the regularization  
 214 function  $\mathcal{R}$  with a different matrix  $\mathfrak{M}_*$  as in equation (16). Importantly, we can see in equation



(16) that the (reduced) selection matrix  $S \in \mathbb{R}_{\geq 0}^{p \times m}$  in Bulyan [7] is equivalent to the total selection matrix  $S_{\text{SA}} \in \mathbb{R}^{p \times p}$  in our FA setup. Moreover, we can also see that domain knowledge in terms of regularization function may also determine the optimal subspace, albeit additively only. We leave the algorithmic implications of our result as future work.

**Remark D.3** (Invertibility of  $\Gamma_*$  in Equation (15).). Theoretically, note that  $\Gamma$  is symmetric, so by Spectral Theorem, we know that its eigen decomposition exists. So, we may use pseudo-inverse instead of its inverse. Computationally, given any primal solution  $Y_*$  we can obtain  $\Gamma_*$  by left multiplying equation (14) by  $Y_*$  and use feasibility i.e.,  $Y_*^T Y_* = I$ . Now, we obtain  $\Gamma_*^{-1}$  columnwise by using some numerical solver such as conjugate gradient (with fixed iterations) on  $\Gamma$  with standard basis vectors. In either case, our proof can be used with the preferred approximation choice of  $\Gamma_*^{-1}$  to get the equivalence as in equation (16).

**Remark D.4** (Provable Robustness Guarantees for FA.). Since our FA scheme is based on convexity, it is possible to show worst-case robustness guarantees for FA iterations under mild technical conditions on  $Y^*$  – even under correlated noise, see for e.g. Assumption 1 in [35]). In fact, by using the selection matrix  $S_{\text{FA}}$  in equation (16) in Lemma 1 in [1] and following the proof, we can get similar provable robustness guarantees for FA. We leave the theoretical analysis as future work.

## E ADDITIONAL EXPERIMENTS

### E.1 The Effect of Regularization Parameter

Our algorithm depends on the regularization parameter  $\lambda$ . Figure 1 below illustrates the effect of this parameter on similarity of aggregated gradient vectors for FA and Multi-Krum. For this experiment, we sample the gradients output by the parameter server across multiple epochs for both FA and Multi-Krum and compute the cosine similarity of corresponding vectors. We repeat the experiment with different  $\lambda$  values. As we can see, for smaller iterations there is some similarity between the gradients computed by FA and Multi-Krum. This similarity is more visible for smaller  $\lambda$  values.

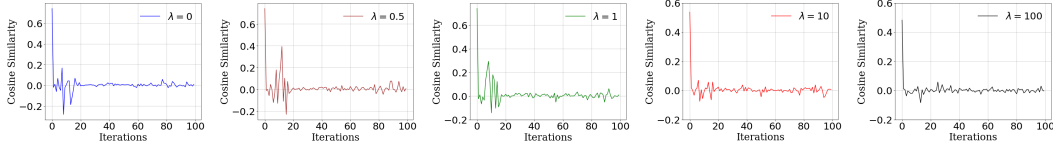

Figure 1: The effect of the regularization parameter  $\lambda$  on similarity of FA performance to Multi-Krum

### E.2 Experiments with the Tiny ImageNet dataset

We repeated our experiments with Tiny ImageNet [36] which contains 100000 images of 200 classes (500 for each class) downsized to 64x64 colored images. We fix our batch size to 192 and use ResNet-50 [37] throughout the experiments

**Tolerance to the number of Byzantine workers:** In this experiment, we have  $p = 15$  workers of which  $f = 1, \dots, 3$  are Byzantine and send random gradients. The accuracy of test data for FA in comparison to other aggregators is shown in Figure 2. As we can see, for  $f = 1$  and  $f = 2$ , FA converges at a higher accuracy than all other schemes. For all cases, FA also converges in  $\sim 2\times$  less number of iterations.

#### Tolerance to communication loss:

We set a 10% loss rate for the links connecting  $f = 1, \dots, 3$  of the workers to the parameter server. Figure 3 shows that our takeaways in the main paper are also confirmed in this setting with the new dataset.

**The effect of having augmented data during training in Byzantine workers:** We choose two non linear augmentation schemes, Lotka Volterra (shown in rows 1 and 3 of Figure 4) and Arnold's Cat Map (shown in rows 2 and 4 of Figure 4).

As seen from the figure, Arnold's Cat Map augmentations stretch the images and rearrange them within a unit square, thus resulting in streaky patterns. Whereas the Lotka Volterra augmentations

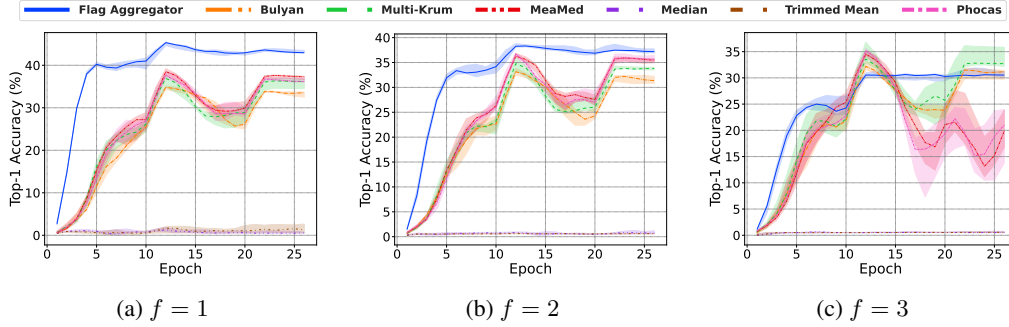

Figure 2: Tolerance to the number of Byzantine workers for robust aggregators.

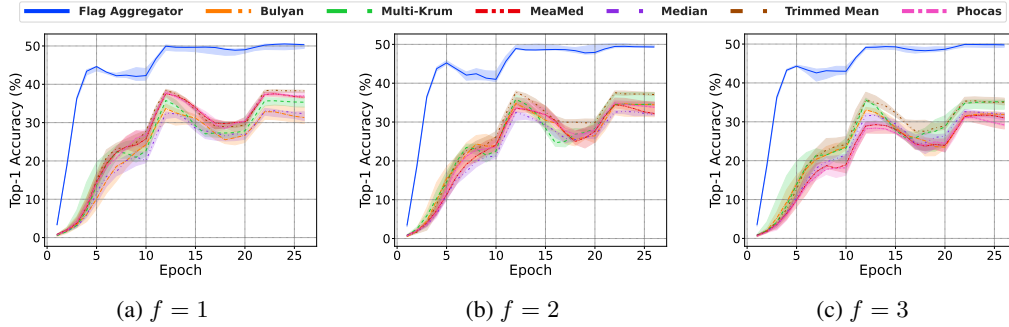

Figure 3: Tolerance to communication loss

257 distort the images while keeping the images similar to the original ones. We perform experiments  
 258 with data augmented with varying shares using the two methods and show the results in Figure 5.  
 259 For CIFAR-10, we showed the results when all of the samples in Byzantine workers are augmented  
 260 in Figure 7 in the main paper. For Tiny ImageNet, this case is shown Figure 5a. Figures 5b and 5c  
 261 show the results under different ratios on CIFAR-10. By changing the ratios we were interested to  
 262 see if streaky patterns augmented by Arnold’s Cat Map would introduce a more adverse effect from  
 263 Byzantine workers compared to Lotka Volterra. Although the results do not show a significant signal,  
 264 we can see that the augmentations did impact the overall gradients, and that FA performs significantly  
 265 better.

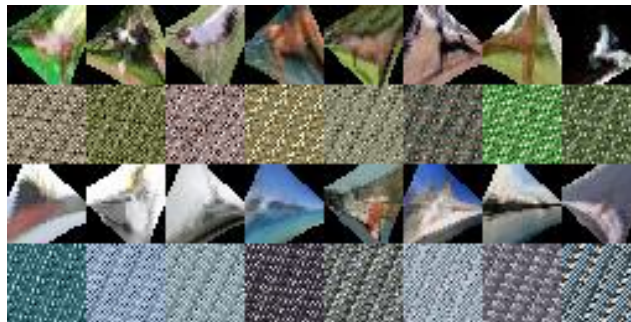

Figure 4: TinyImagenet data with Augmentation: **Row 1:** Lotka Volterra augmentation on Class Horse. **Row 2:** Arnold’s Cat Map augmentation on Class Horse. **Row 3:** Lotka Volterra augmentation on Class Ship. **Row 4:** Arnold’s Cat Map augmentation on Class Ship.

266 **We have attached our code for running the experiments and reproducing the results in the zip**  
 267 **file.**



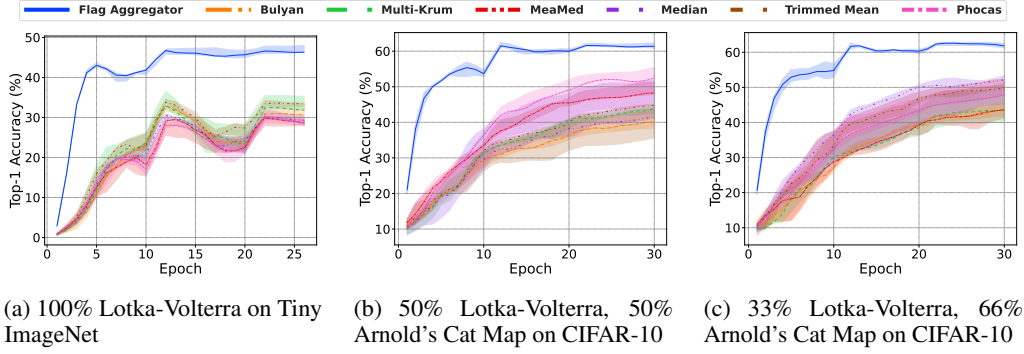

Figure 5: Accuracy of using augmented data in  $f = 3$  workers

## References

- [1] Georgios Damaskinos, El-Mahdi El-Mhamdi, Rachid Guerraoui, Arsany Guirguis, and Sébastien Rouault. Aggregathor: Byzantine machine learning via robust gradient aggregation. *Proceedings of Machine Learning and Systems*, 1:81–106, 2019.
- [2] Jeremy Bernstein, Jiawei Zhao, Kamyar Azizzadenesheli, and Anima Anandkumar. signsgd with majority vote is communication efficient and fault tolerant. In *7th International Conference on Learning Representations, ICLR 2019, New Orleans, LA, USA, May 6-9, 2019*, 2019.
- [3] Peva Blanchard, El Mahdi El Mhamdi, Rachid Guerraoui, and Julien Stainer. Machine learning with adversaries: Byzantine tolerant gradient descent. In *Proceedings of the 31st International Conference on Neural Information Processing Systems, NIPS’17*, page 118–128. Curran Associates Inc., 2017. ISBN 9781510860964.
- [4] Shashank Rajput, Hongyi Wang, Zachary Charles, and Dimitris Papailiopoulos. Detox: A redundancy-based framework for faster and more robust gradient aggregation. In H. Wallach, H. Larochelle, A. Beygelzimer, F. d’Alché-Buc, E. Fox, and R. Garnett, editors, *Advances in Neural Information Processing Systems*, volume 32, 2019.
- [5] Lingjiao Chen, Hongyi Wang, Zachary Charles, and Dimitris Papailiopoulos. DRACO: Byzantine-resilient distributed training via redundant gradients. In *Proceedings of the 35th International Conference on Machine Learning*, volume 80 of *Proceedings of Machine Learning Research*, pages 903–912. PMLR, 10–15 Jul 2018.
- [6] Dong Yin, Yudong Chen, Ramchandran Kannan, and Peter Bartlett. Byzantine-robust distributed learning: Towards optimal statistical rates. In *Proceedings of the 35th International Conference on Machine Learning*, volume 80 of *Proceedings of Machine Learning Research*, pages 5650–5659. PMLR, 10–15 Jul 2018.
- [7] El Mahdi El Mhamdi, Rachid Guerraoui, and Sébastien Rouault. The hidden vulnerability of distributed learning in Byzantium. In *Proceedings of the 35th International Conference on Machine Learning*, volume 80 of *Proceedings of Machine Learning Research*, pages 3521–3530. PMLR, 10–15 Jul 2018.
- [8] Christian Kümmerle, Claudio Mayrink Verdun, and Dominik Stöger. Iteratively reweighted least squares for basis pursuit with global linear convergence rate. *Advances in Neural Information Processing Systems*, 34:2873–2886, 2021.
- [9] Deeksha Adil, Richard Peng, and Sushant Sachdeva. Fast, provably convergent irls algorithm for p-norm linear regression. *Advances in Neural Information Processing Systems*, 32, 2019.
- [10] Massimo Fornasier, Holger Rauhut, and Rachel Ward. Low-rank matrix recovery via iteratively reweighted least squares minimization. *SIAM Journal on Optimization*, 21(4):1614–1640, 2011.

- [11] Yuxin Chen, Yuejie Chi, Jianqing Fan, Cong Ma, and Yuling Yan. Noisy matrix completion: Understanding statistical guarantees for convex relaxation via nonconvex optimization. *SIAM journal on optimization*, 30(4):3098–3121, 2020.
- [12] Fanny Yang, Zuowen Wang, and Christina Heinze-Deml. Invariance-inducing regularization using worst-case transformations suffices to boost accuracy and spatial robustness. In H. Wallach, H. Larochelle, A. Beygelzimer, F. d'Alché-Buc, E. Fox, and R. Garnett, editors, *Advances in Neural Information Processing Systems*, volume 32. Curran Associates, Inc., 2019. URL <https://proceedings.neurips.cc/paper/2019/file/1d01bd2e16f57892f0954902899f0692-Paper.pdf>.
- [13] Christina Heinze-Deml and Nicolai Meinshausen. Conditional variance penalties and domain shift robustness, 2017. URL <https://arxiv.org/abs/1710.11469>.
- [14] Saeid Motiian, Marco Piccirilli, Donald A. Adjeroh, and Gianfranco Doretto. Unified deep supervised domain adaptation and generalization. In *IEEE International Conference on Computer Vision (ICCV)*, 2017.
- [15] Chris M. Bishop. Training with noise is equivalent to tikhonov regularization. *Neural Computation*, 7(1):108–116, 1995. doi: 10.1162/neco.1995.7.1.108.
- [16] Zhun Zhong, Liang Zheng, Guoliang Kang, Shaozi Li, and Yi Yang. Random erasing data augmentation. *Proceedings of the AAAI Conference on Artificial Intelligence*, 34:13001–13008, Apr. 2020. doi: 10.1609/aaai.v34i07.7000. URL <https://ojs.aaai.org/index.php/AAAI/article/view/7000>.
- [17] Terrance DeVries and Graham W Taylor. Improved regularization of convolutional neural networks with cutout. *arXiv preprint arXiv:1708.04552*, 2017.
- [18] Yash Goyal, Tejas Khot, Douglas Summers-Stay, Dhruv Batra, and Devi Parikh. Making the v in vqa matter: Elevating the role of image understanding in visual question answering. *International Journal of Computer Vision*, 127:398–414, 2017.
- [19] Yen-Chun Chen, Linjie Li, Licheng Yu, Ahmed El Kholy, Faisal Ahmed, Zhe Gan, Yu Cheng, and Jingjing Liu. Uniter: Universal image-text representation learning. In *ECCV*, 2020.
- [20] Yu Huang, Chenzhuang Du, Zihui Xue, Xuanyao Chen, Hang Zhao, and Longbo Huang. What makes multimodal learning better than single (provably). In *NeurIPS*, 2021.
- [21] Miguel Sousa Lobo, Lieven Vandenbergh, Stephen Boyd, and Hervé Lebret. Applications of second-order cone programming. *Linear algebra and its applications*, 284(1-3):193–228, 1998.
- [22] Srinadh Bhojanapalli, Nicolas Boumal, Prateek Jain, and Praneeth Netrapalli. Smoothed analysis for low-rank solutions to semidefinite programs in quadratic penalty form. In *Conference On Learning Theory*, pages 3243–3270. PMLR, 2018.
- [23] Chungeng Shen, Yunlong Wang, Wenjuan Xue, and Lei-Hong Zhang. An accelerated active-set algorithm for a quadratic semidefinite program with general constraints. *Computational Optimization and Applications*, 78(1):1–42, 2021.
- [24] Ariel Kleiner, Ali Rahimi, and Michael Jordan. Random conic pursuit for semidefinite programming. *Advances in Neural Information Processing Systems*, 23, 2010.
- [25] Hans D Mittelmann. An independent benchmarking of sdp and socp solvers. *Mathematical Programming*, 95(2):407–430, 2003.
- [26] Nathan Mankovich, Emily J King, Chris Peterson, and Michael Kirby. The flag median and flagirls. In *Proceedings of the IEEE/CVF Conference on Computer Vision and Pattern Recognition*, pages 10339–10347, 2022.
- [27] Robert J Vanderbei and Hande Yurttan. Using loqo to solve second-order cone programming problems. *Constraints*, 1(2), 1998.

- 348 [28] Hezhi Luo, Xiaodi Bai, Gino Lim, and Jiming Peng. New global algorithms for quadratic  
349 programming with a few negative eigenvalues based on alternative direction method and convex  
350 relaxation. *Mathematical Programming Computation*, 11(1):119–171, 2019.
- 351 [29] A Shapiro and JD Botha. Dual algorithm for orthogonal procrustes rotations. *SIAM journal on*  
352 *matrix analysis and applications*, 9(3):378–383, 1988.
- 353 [30] Michel X Goemans and David P Williamson. Improved approximation algorithms for maximum  
354 cut and satisfiability problems using semidefinite programming. *Journal of the ACM (JACM)*,  
355 42(6):1115–1145, 1995.
- 356 [31] Steven Diamond and Stephen Boyd. CVXPY: A Python-embedded modeling language for  
357 convex optimization. *Journal of Machine Learning Research*, 17(83):1–5, 2016.
- 358 [32] Akshay Agrawal, Robin Verschueren, Steven Diamond, and Stephen Boyd. A rewriting system  
359 for convex optimization problems. *Journal of Control and Decision*, 5(1):42–60, 2018.
- 360 [33] Prateek Jain, Purushottam Kar, et al. Non-convex optimization for machine learning. *Founda-*  
361 *tions and Trends® in Machine Learning*, 10(3-4):142–363, 2017.
- 362 [34] Liqun Qi. Some simple estimates for singular values of a matrix. *Linear algebra and its*  
363 *applications*, 56:105–119, 1984.
- 364 [35] Olga Klopp, Karim Lounici, and Alexandre B. Tsybakov. Robust matrix completion, 2016.
- 365 [36] Ya Le and Xuan S. Yang. Tiny imagenet visual recognition challenge, 2015.
- 366 [37] Kaiming He, Xiangyu Zhang, Shaoqing Ren, and Jian Sun. Deep residual learning for image  
367 recognition. In *2016 IEEE Conference on Computer Vision and Pattern Recognition (CVPR)*,  
368 pages 770–778, 2016. doi: 10.1109/CVPR.2016.90.
